# Supplementary material for: Ni2P Nanoparticle-Inserted Porous Layered NiO Hetero-Structured Nanosheets as a Durable Catalyst for the Electro-Oxidation of Urea
Source: Nanomaterials (Basel). 2022 Oct 17;12(20):3633. doi: 10.3390/nano12203633 (PMC9611741; doi:10.3390/nano12203633)
Supplement: Supplementary file 1 [file nanomaterials-12-03633-s001.zip › nanomaterials-1930157-supplementary.pdf]

## Supplementary Materials

### Ni<sub>2</sub>P Nanoparticle-Inserted Porous Layered NiO Hetero-Structured Nanosheets as a Durable Catalyst for the Electro-Oxidation of Urea

Kun Ma <sup>1</sup>, Hui Wang <sup>2,\*</sup>, Palanisamy Kannan <sup>2,\*</sup> and Palaniappan Subramanian <sup>3,\*</sup>

<sup>1</sup> Department of Internet, Jiaxing Vocational Technical College, Jiaxing 314001, China;

<sup>2</sup> College of Biological, Chemical Sciences and Engineering, Jiaxing University, Jiaxing 314001, China

<sup>3</sup> New Technologies-Research Center, University of West Bohemia, 30100 Plzeň, Czech Republic

\* Correspondence: huiwang@zjxu.edu.cn (H.W.); ktpkannan@zjxu.edu.cn (P.K.); palans@ntc.zcu.cz (P.S.);

Tel.: +86-19857386580 (P.K.); Fax: +86-573-83643264 (P.K.)

#### *LSV, EIS, and ECSA measurements.*

LSV measurements were performed at a scan rate of 5 mV s<sup>-1</sup> and corrected for *iR* compensation (100.0%). Next, EIS analysis was carried out for EOU by applying electrode frequency from 0.01 to 1,000,000 Hz at a amplitude of 5 mV and 1.34 V (RHE) potential was applied for EIS measurements. The ECSA of as-fabricated catalyst electrodes were accessed by double-layer capacitance (*C<sub>dl</sub>*) that obtained through CV responses of non-Faradaic areas from -0.1 V to 0.0 V vs. Hg/HgO at scan rates from 20 mV s<sup>-1</sup> to 100 mV s<sup>-1</sup>. The catalytic current at -0.1 V and 0.0 V was used to obtain *C<sub>dl</sub>* and ECSA based on given formula:

$$j = v \cdot C_{dl}$$

$$ECSA = C_{dl} / (C_s \times A)$$

where *j* = double-layer charging current density, *v* = scan rate, *C<sub>s</sub>* = specific capacitance of catalyst electrode (mF cm<sup>-2</sup>), and *A* = area of working electrode (cm<sup>2</sup>). *C<sub>s</sub>* value of alkaline solution was referred as 40.0 mF cm<sup>-2</sup>.

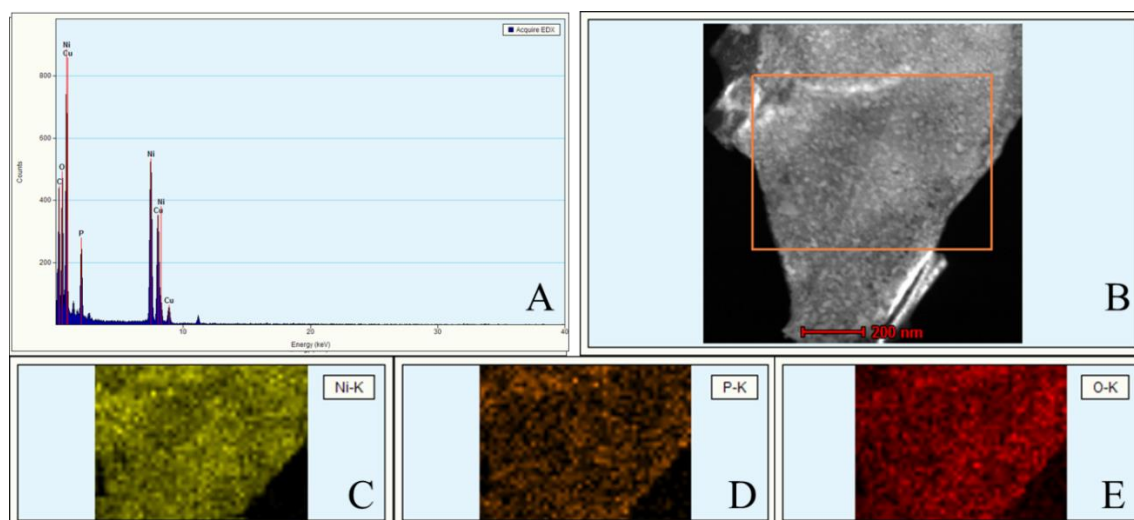

**Figure S1.** EDX analysis of  $\text{Ni}_2\text{P}@ \text{NiO}/\text{NiF-40}$  catalyst sample (A), and corresponding STEM and EELS elemental mappings of Ni, O, P elements (B-E).

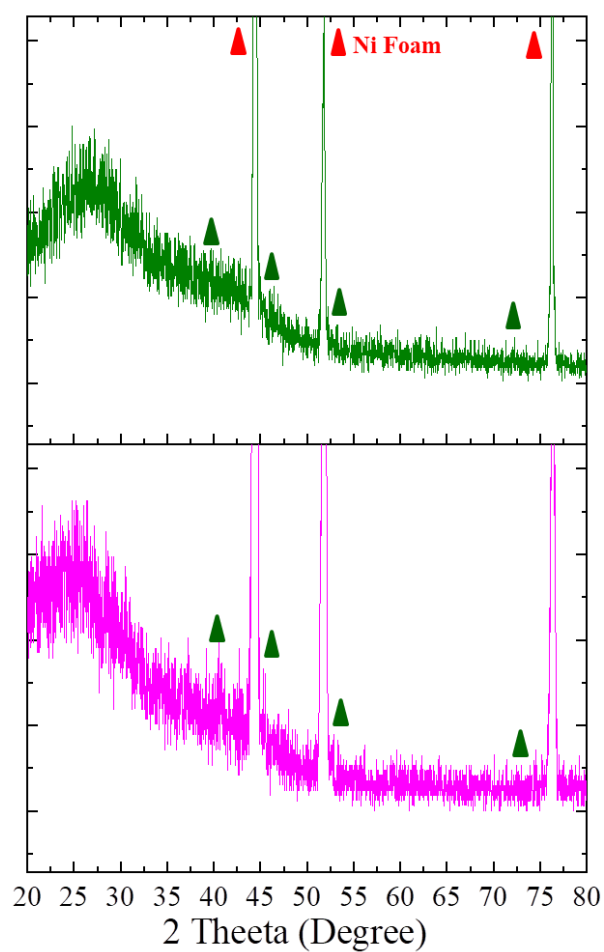

**Figure S2.** XRD pattern profiles of  $\text{Ni}_2\text{P}@ \text{NiO}$  catalyst samples prepared at 20 min (top), and 60 min (bottom) phosphating time.

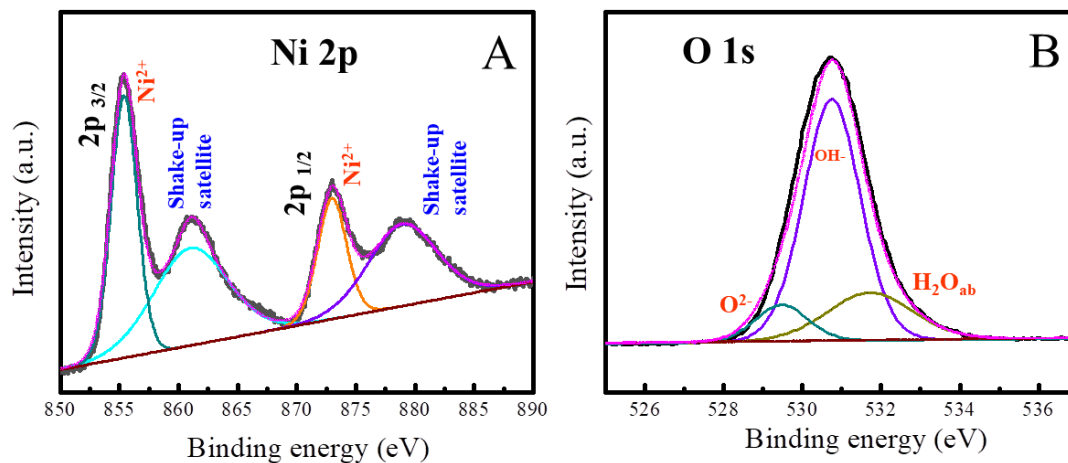

**Figure S3.** XPS spectra obtained for Ni 2p (A) and O 1s (B) of  $Ni(OH)_2/NiF$  catalyst sample.

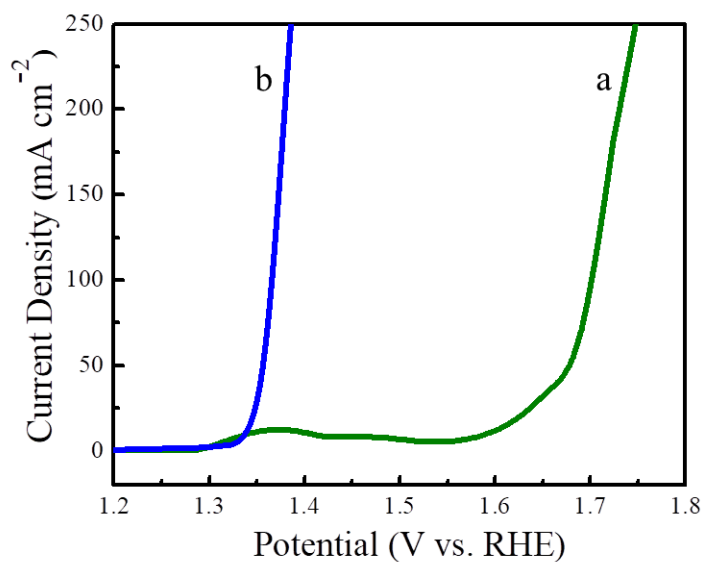

**Figure S4.** LSVs of  $Ni_2P@NiO/NF-40$  catalyst electrode demonstrating the difference between OER (a) and EOU (b) profiles in 1 M KOH alone and 1.0 M KOH + 0.33 M urea at a scan rate of  $5\ mV\ s^{-1}$ .

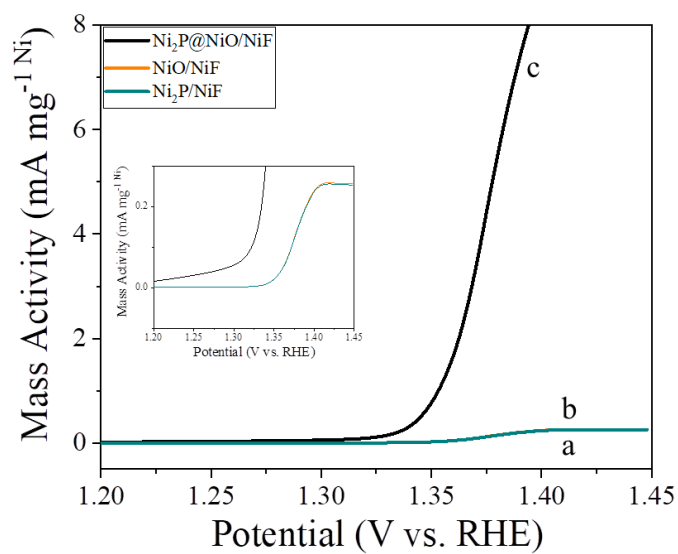

**Figure S5.** Mass activity based EOU responses obtained for  $\text{Ni}_2\text{P}$  NPs/NiF (line a), NiO/NiF (line b), and  $\text{Ni}_2\text{P}@ \text{NiO}/\text{NiF}$  (curve c). Inset: Expanded view of  $\text{Ni}_2\text{P}$  NPs/NiF (line a), and NiO/NiF (line b).

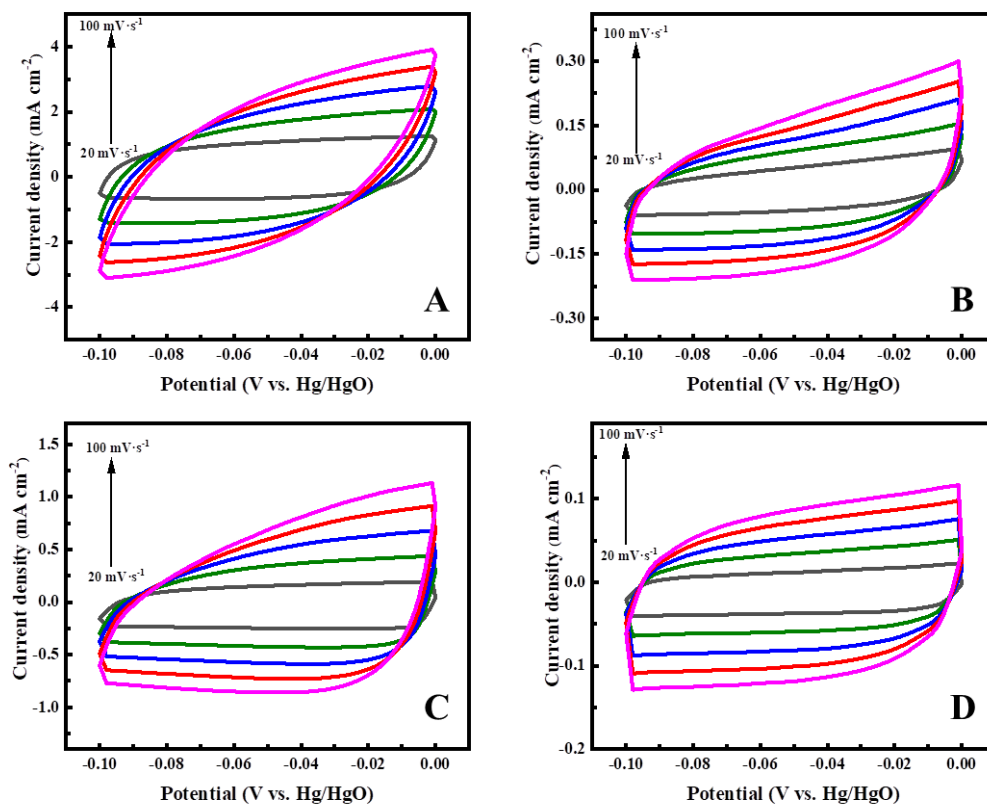

**Figure S6.** Cyclic voltammetry curves obtained at different scan rates (20 mV/s to 100 mV/s) of  $\text{Ni}_2\text{P}@ \text{NiO}/\text{NF}-40$  (a), NiO/NF (b),  $\text{Ni}_2\text{P}/\text{NF}$  (c) and NiF (d) for EOU reaction.

**Table S1.** Comparison of UOR performance of some representative reported Ni-based catalysts used for urea electrolysis.

| Nanomaterials                              | Structure     | Electrolyte         | UOR Potential (V vs. RHE)        | References       |
|--------------------------------------------|---------------|---------------------|----------------------------------|------------------|
| Ni <sub>2</sub> P/Fe <sub>2</sub> P/NiF    | Nanoparticle  | 1 M KOH+0.5 M Urea  | 1.36 (10 mA cm <sup>-2</sup> )   | [1]              |
| Ni-Mo/NiF                                  | Nanotube      | 1 M KOH+0.1 M Urea  | 1.36 (10 mA cm <sup>-2</sup> )   | [2]              |
| FQD/CoNi-LDH/NiF                           | Nanosheet     | 1 M KOH+0.5 M Urea  | 1.36 (10 mA cm <sup>-2</sup> )   | [3]              |
| Nickel terephthalate                       | MOF Nanosheet | 1 M KOH+0.5 M Urea  | 1.381 (10 mA cm <sup>-2</sup> )  | [4]              |
| MoP@NiCo-LDH/NiF                           | Nanosheet     | 1 M KOH+0.5 M Urea  | 1.392 (100 mA cm <sup>-2</sup> ) | [5]              |
| Ni <sub>3</sub> N/NiF                      | Nanosheet     | 1 M KOH+0.5 M Urea  | 1.406 (100 mA cm <sup>-2</sup> ) | [6]              |
| Ni <sub>2</sub> P/Ni <sub>0.96</sub> S/NiF | Microsphere   | 1 M KOH+0.5 M Urea  | 1.441 (100 mA cm <sup>-2</sup> ) | [7]              |
| Fe/Ni oxide                                | Nanorod       | 1 M KOH+0.33 M Urea | 1.45 (30 mA cm <sup>-2</sup> )   | [8]              |
| Ni <sub>2</sub> P@NiO/NiF                  | Nanosheet     | 1 M KOH+0.33 M Urea | 1.35 (50 mA cm <sup>-2</sup> )   | <b>This work</b> |

## References

1. Yan, L.; Sun, Y.; Hu, E.; Ning, J.; Zhong, Y.; Zhang, Z.; Hu, Y., Facile in-situ growth of Ni<sub>2</sub>P/Fe<sub>2</sub>P nanohybrids on Ni foam for highly efficient urea electrolysis. *Journal of Colloid and Interface Science* **2019**, 541, 279-286.
2. Zhang, J.-Y.; He, T.; Wang, M.; Qi, R.; Yan, Y.; Dong, Z.; Liu, H.; Wang, H.; Xia, B. Y., Energy-saving hydrogen production coupling urea oxidation over a bifunctional nickel-molybdenum nanotube array. *Nano Energy* **2019**, 60, 894-902.
3. Feng, Y.; Wang, X.; Huang, J.; Dong, P.; Ji, J.; Li, J.; Cao, L.; Feng, L.; Jin, P.; Wang, C., Decorating CoNi layered double hydroxides nanosheet arrays with fullerene quantum dot anchored on Ni foam for efficient electrocatalytic water splitting and urea electrolysis. *Chemical Engineering Journal* **2020**, 390, 124525.
4. Zheng, S.; Zheng, Y.; Xue, H.; Pang, H., Ultrathin nickel terephthalate nanosheet three-dimensional aggregates with disordered layers for highly efficient overall urea electrolysis. *Chemical Engineering Journal* **2020**, 395, 125166.
5. Wang, T.; Wu, H.; Feng, C.; Zhang, L.; Zhang, J., MoP@NiCo-LDH on nickel foam as bifunctional electrocatalyst for high efficiency water and urea–water electrolysis. *Journal of Materials Chemistry A* **2020**, 8, (35), 18106-18116.
6. Zhao, Z.; Zhao, J.; Wang, H.; Li, X.; Yang, L.; Zhao, Z.; Liu, X.; Liu, Y.; Liu, P.; Cai, Z., Porous flower-like nickel nitride as highly efficient bifunctional electrocatalysts for less energy-intensive hydrogen evolution and urea oxidation. *International Journal of Hydrogen Energy* **2020**, 45, (28), 14199-14207.

7. He, M.; Feng, C.; Liao, T.; Hu, S.; Wu, H.; Sun, Z., Low-Cost Ni<sub>2</sub>P/Ni<sub>0.96</sub>S Heterostructured Bifunctional Electrocatalyst toward Highly Efficient Overall Urea-Water Electrolysis. *ACS Applied Materials & Interfaces* **2020**, 12, (2), 2225-2233.
8. Gu, X.; Yang, D.; Liu, Z.; Wang, S.; Feng, L., Iron oxide promoted nickel/nickel oxide rough nanorods for efficient urea assisted water splitting. *Electrochimica Acta* **2020**, 353, 136516.
